# Supplementary material
Source: PubMed Central journal article supplement (PMC3539251)
Supplement: Supp_Table1.pdf [file Supp_Table1.pdf]

SUPPLEMENTARY TABLE S1. BASELINE CHARACTERISTICS  
OF PAPILLARY THYROID CANCER CASES  
AND CANCER-FREE CONTROLS

| Variables                | n (%)               |                  | $\chi^2$ | p <sup>a</sup>           |
|--------------------------|---------------------|------------------|----------|--------------------------|
|                          | Controls<br>(n=564) | Cases<br>(n=368) |          |                          |
| Age (years)              |                     |                  | 2.54     | 0.111                    |
| < 45                     | 255 (45.20)         | 186 (50.50)      |          |                          |
| ≥ 45                     | 309 (54.80)         | 182 (49.50)      |          |                          |
| Sex                      |                     |                  | 2.79     | 0.095                    |
| Male                     | 171 (30.3)          | 93 (25.3)        |          |                          |
| Female                   | 393 (69.7)          | 275 (74.7)       |          |                          |
| BMI                      |                     |                  | 3.29     | 0.349                    |
| Underweight              | 19 (3.4)            | 15 (4.1)         |          |                          |
| Normal                   | 198 (35.3)          | 145 (39.6)       |          |                          |
| Overweight               | 255 (45.5)          | 149 (40.7)       |          |                          |
| Obesity                  | 89 (15.9)           | 57 (15.6)        |          |                          |
| Family history of cancer |                     |                  | 0.41     | 0.522                    |
| No                       | 503 (89.2)          | 333 (90.5)       |          |                          |
| Yes                      | 61 (10.8)           | 35 (9.5)         |          |                          |
| Smoking status           |                     |                  | 36.61    | <b>0.001<sup>b</sup></b> |
| Never                    | 429 (76.1)          | 337 (91.6)       |          |                          |
| Ever                     | 135 (23.9)          | 31 (8.4)         |          |                          |
| Alcohol use              |                     |                  | 55.83    | <b>0.001<sup>b</sup></b> |
| Never                    | 438 (77.7)          | 352 (95.7)       |          |                          |
| Ever                     | 126 (22.3)          | 16 (4.3)         |          |                          |

<sup>a</sup>Two-sided  $\chi^2$  test.

<sup>b</sup>Boldface indicates statistical significance ( $p < 0.05$ ).

BMI, body mass index.
