# Supplementary material
Source: PubMed Central journal article supplement (PMC3539251)
Supplement: Supp_Table2.pdf [file Supp_Table2.pdf]

SUPPLEMENTARY TABLE S2. FREQUENCY DISTRIBUTIONS OF BRAF GENOTYPES BY EXTRATHYROIDAL EXTENSION IN PATIENTS WITH PAPILLARY THYROID CANCER

| Variants        | No, n (%)  | Yes, n (%) | OR [CI] <sup>a</sup>                 |
|-----------------|------------|------------|--------------------------------------|
| rs1042179: A>G  |            |            |                                      |
| AA              | 136 (70.5) | 121 (70.3) | 1.00                                 |
| AG              | 51 (26.4)  | 47 (27.3)  | 0.95 [0.59–1.52]                     |
| GG              | 6 (3.1)    | 4 (2.3)    | 1.33 [0.36–4.93]                     |
| GG+AG           | 57 (29.5)  | 51 (29.7)  | 0.97 [0.62–1.54]                     |
| rs11762469: A>T |            |            |                                      |
| AA              | 134 (69.1) | 113 (65.7) | 1.00                                 |
| AT              | 55 (28.4)  | 55 (32.0)  | 0.85 [0.54–1.34]                     |
| TT              | 5 (2.6)    | 4 (2.3)    | 1.10 [0.28–4.23]                     |
| AT+TT           | 60 (30.9)  | 59 (34.3)  | 1.87 [0.56–1.35]                     |
| rs17161747: G>C |            |            |                                      |
| GG              | 124 (63.9) | 119 (69.2) | 1.00                                 |
| GC              | 59 (30.4)  | 51 (29.7)  | 1.14 [0.72–1.82]                     |
| CC              | 11 (5.7)   | 2 (1.2)    | <b>5.72 [1.22–26.77]<sup>b</sup></b> |
| GC+CC           | 70 (36.1)  | 53 (30.8)  | 1.32 [0.84–2.06]                     |
| rs3748093: T>A  |            |            |                                      |
| TT              | 117 (60.6) | 100 (58.1) | 1.00                                 |
| AT              | 68 (35.2)  | 60 (34.9)  | 0.98 [0.63–1.52]                     |
| AA              | 8 (4.1)    | 12 (7.0)   | 0.54 [0.21–1.37]                     |
| AT+AA           | 76 (42.7)  | 72 (36.4)  | 0.90 [0.59–1.37]                     |

<sup>a</sup>ORs are adjusted for age, sex, cancer familial history, alcohol drinking, and smoking.

<sup>b</sup>Boldface indicates statistical significance ( $p < 0.05$ ).

CI, 95% confidence interval; OR, odds ratio.
